# Supplementary material for: Controllable magnetism driven by carrier confinement and ferroelectric polarization in a two-dimensional heterostructure
Source: Royal Society of Chemistry journal article supplement (doi:10.1039/d0tc04272b), 2020-01-01
Supplement: d0tc04272b1.pdf [file d0tc04272b1.pdf]

# Controllable Magnetism Driven by Carrier Confinement and Ferroelectric Polarization in a Two-Dimensional Heterostructure

*Ziye Zhu<sup>1,2</sup>, Xiaofang Chen<sup>1</sup>, Wenbin Li<sup>2\*</sup> and Jingshan Qi<sup>1\*</sup>*

<sup>1</sup>School of Physics and Electronic Engineering, Jiangsu Normal University, Xuzhou  
221116, People's Republic of China

<sup>2</sup> Key Laboratory of 3D Micro/Nano Fabrication and Characterization of Zhejiang  
Province, School of Engineering, Westlake University, Hangzhou 310024, People's  
Republic of China

## **Corresponding Authors**

\*liwenbin@westlake.edu.cn; qijingshan@jsnu.edu.cn

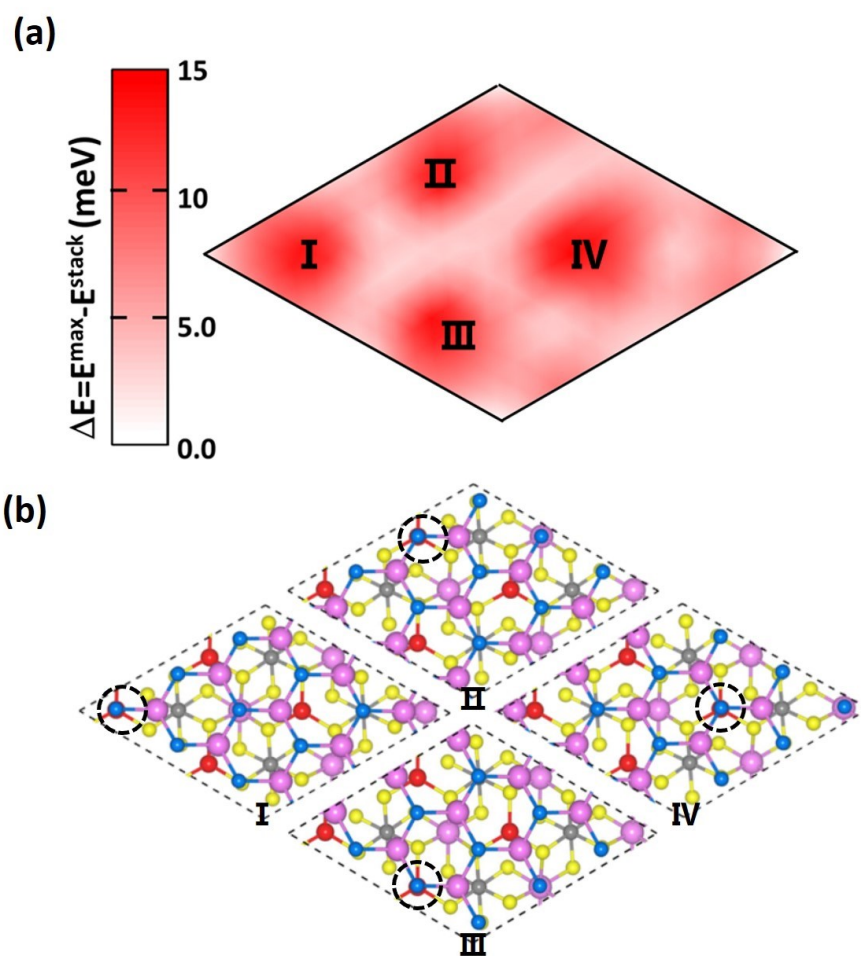

**Figure S1.** (a) Total energy as a function of interlayer translation for CuInP<sub>2</sub>S<sub>6</sub>/InSe.

(b) The most stable four equivalent configurations.

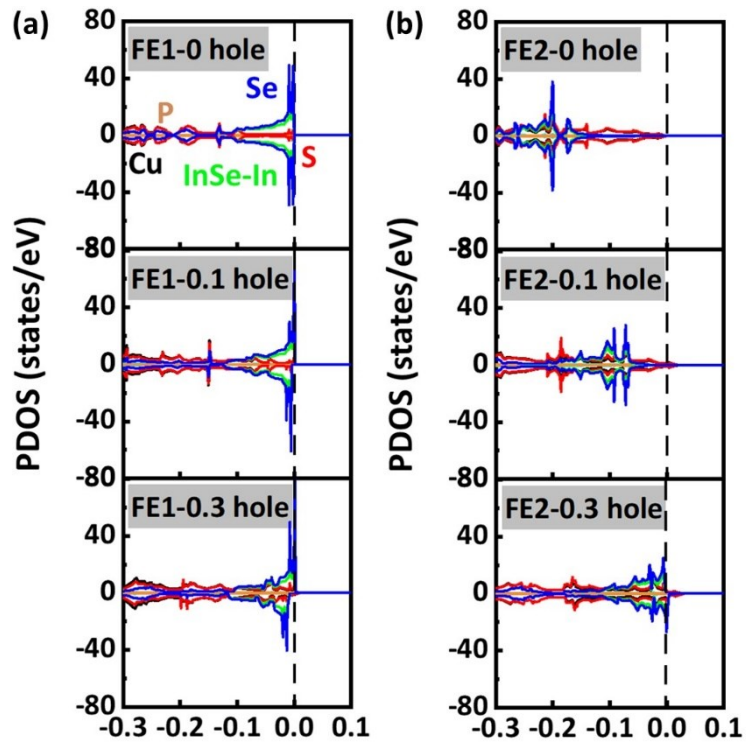

**Figure S2.** Projected density of states (PDOS) for FE1 (a) and FE2 (b) phases of  $\text{CuInP}_2\text{S}_6/\text{InSe}$  at the doping concentration 0, 0.1 and 0.3 hole per cell. The Fermi level is set to zero.
